# Supplementary material for: Characterization of polarized THP-1 macrophages and polarizing ability of LPS and food compounds
Source: Royal Society of Chemistry journal article supplement (doi:10.1039/c2fo30156c), 2012-10-04
Supplement: c2fo30156c.pdf [file c2fo30156c.pdf]

1 **Supplementary Table 1** Fold induction of chemokines and their receptor genes in polarized  
 2 M1-M2 THP-1 macrophages

| Gene name | GenBankID  | M1        | M2             | Ratio M1:M2 |
|-----------|------------|-----------|----------------|-------------|
| CXCL9*    | NM_002416  | 179298.02 | 7.12           | 25180.16    |
| CCL8      | NM_005623  | 98102.34  | <b>52.06</b>   | 1884.54     |
| CXCL10*   | NM_001565  | 9165.51   | 2.00           | 4576.41     |
| CXCL11*   | NM_005409  | 2339.53   | 1.42           | 1652.00     |
| CCR7*     | NM_001838  | 2152.80   | 1.07           | 2019.80     |
| CXCL2     | NM_002089  | 1522.26   | 0.47           | 3236.01     |
| CCL4*     | NM_002984  | 1343.70   | 2.55           | 526.39      |
| TNF*      | NM_000594  | 1076.40   | 1.62           | 666.29      |
| CXCL1     | NM_001511  | 930.59    | 0.42           | 2210.26     |
| CXCL3     | NM_002090  | 917.78    | 0.56           | 1652.00     |
| IL1A      | NM_000575  | 626.86    | 0.68           | 916.51      |
| IL-8      | NM_000584  | 502.16    | 0.24           | 2091.03     |
| CCL3*     | NM_005408  | 407.88    | 0.94           | 433.53      |
| CCL19     | NM_006274  | 269.10    | 0.40           | 680.29      |
| CCL1§     | NM_002981  | 232.65    | 2.85           | 81.57       |
| CSF3      | NM_000759  | 157.81    | 1.10           | 144.01      |
| CCL2*     | NM_002982  | 144.21    | 6.69           | 21.56       |
| CCL7      | NM_006273  | 91.27     | <b>10.87</b>   | 8.40        |
| CCL5*     | NM_002985  | 53.15     | 2.15           | 24.76       |
| CXCL6     | NM_002993  | 40.00     | 0.46           | 86.82       |
| CXCL13    | NM_006419  | 38.91     | 0.61           | 64.00       |
| CXCL12    | NM_000609  | 38.64     | 0.86           | 44.94       |
| NFKB1     | NM_003998  | 12.57     | 1.34           | 9.38        |
| CCL18§    | NM_002988  | 12.06     | 5.55           | 2.17        |
| CCL13     | NM_005408  | 11.02     | <b>1609.06</b> | 0.01        |
| CCRL2     | NM_003965  | 9.01      | 1.01           | 8.94        |
| HIF1A     | NM_001530  | 6.78      | 0.94           | 7.21        |
| TYMP      | NM_001953  | 5.59      | 0.36           | 15.45       |
| SLIT2     | NM_004787  | 5.14      | 0.96           | 5.35        |
| HCAR1     | NM_0032554 | 4.93      | 0.57           | 8.69        |
| CCL11     | NM_002986  | 3.19      | 0.35           | 9.19        |
| TLR4*     | NM_138554  | 2.99      | 0.81           | 3.71        |
| MYD88     | NM_002468  | 2.87      | 0.43           | 6.68        |
| CXCL5     | NM_002994  | 2.81      | 0.08           | 34.78       |
| CCL17§    | NM_002987  | 2.77      | 1.19           | 2.33        |
| MMP7      | NM_002423  | 2.74      | 1.74           | 1.57        |
| TLR2*     | NM_003264  | 2.59      | 0.30           | 8.51        |
| CCR4      | NM_005508  | 2.47      | 1.10           | 2.25        |
| GPR31     | NM_005299  | 2.47      | 1.10           | 2.25        |
| APLNR     | NM_005161  | 2.47      | 1.10           | 2.25        |
| CCL15     | NM_032965  | 2.47      | 0.84           | 2.93        |
| CCR10     | NM_016602  | 2.47      | 1.10           | 2.25        |
| CCR6      | NM_004367  | 2.47      | 1.55           | 1.59        |
| CCR8      | NM_005201  | 2.47      | 1.10           | 2.25        |
| GDF5      | NM_000557  | 2.47      | 1.10           | 2.25        |
| IL-13     | NM_002188  | 2.47      | 1.10           | 2.25        |
| IL-4      | NM_000589  | 2.47      | 1.10           | 2.25        |
| CXCR1     | NM_001337  | 2.47      | 1.10           | 2.25        |
| XCL1      | NM_002995  | 2.47      | 1.10           | 2.25        |
| XCR1      | NM_005283  | 2.47      | 1.10           | 2.25        |
| CCL16§    | NM_004590  | 2.47      | 1.10           | 2.25        |
| CX3CL1    | NM_002996  | 2.00      | 1.88           | 1.06        |

|          |              |      |      |             |
|----------|--------------|------|------|-------------|
| CMTM2    | NM_144673    | 1.72 | 0.79 | 2.19        |
| CYFIP2   | NM_014376    | 1.44 | 1.24 | 1.16        |
| CXCR3    | NM_001504    | 1.35 | 0.51 | 2.62        |
| TNFSF14  | NM_003807    | 1.30 | 0.46 | 2.81        |
| CCR5     | NM_000579    | 1.19 | 0.73 | 1.62        |
| VHL      | NM_000551    | 1.13 | 1.00 | 1.13        |
| CCR1     | NM_001295    | 1.04 | 0.87 | 1.19        |
| TCP10    | NM_004610    | 1.01 | 0.15 | 6.54        |
| CXCR4    | NM_003467    | 0.95 | 0.45 | 2.08        |
| LTB4R    | NM_181657    | 0.93 | 0.61 | 1.54        |
| AIMP1    | NM_005161    | 0.88 | 1.32 | 0.67        |
| SDF2     | NM_006923    | 0.84 | 0.75 | 1.12        |
| TREM1    | NM_018643    | 0.82 | 0.96 | 0.86        |
| C5       | NM_001735    | 0.68 | 0.74 | 0.93        |
| CMTM1    | NM_181269    | 0.60 | 2.21 | 0.27        |
| IL-18    | NM_001562    | 0.54 | 0.33 | 1.64        |
| CCBP2    | NM_001296    | 0.51 | 0.19 | 2.69        |
| CCRL1    | NM_016557    | 0.50 | 0.19 | 2.66        |
| CXCR6    | NM_006564    | 0.48 | 0.29 | 1.68        |
| CXCR5    | NM_001716    | 0.44 | 0.23 | 1.93        |
| CMKLR1   | NM_004072    | 0.39 | 0.27 | 1.45        |
| MMP2     | NM_004530    | 0.37 | 0.31 | 1.20        |
| CKLF     | NM_181641    | 0.36 | 1.48 | 0.24        |
| CCR3     | NM_001837    | 0.31 | 0.34 | 0.91        |
| CMTM4    | NM_178818    | 0.23 | 0.31 | 0.73        |
| CMTM3    | NM_144601    | 0.20 | 0.53 | 0.37        |
| BDNF     | NM_001709    | 0.19 | 1.23 | 0.15        |
| C5AR1    | NM_001736    | 0.18 | 0.20 | 0.93        |
| TNFRSF1A | NM_001065    | 0.16 | 1.41 | 0.11        |
| IL-16    | NM_004513    | 0.10 | 0.08 | 1.34        |
| CCR2§    | NM_001123396 | 0.08 | 0.51 | <b>0.16</b> |
| CX3CR1   | NM001337     | 0.05 | 0.30 | 0.16        |

3

4
